# Supplementary material for: Daily Rhythm of Fractal Cardiac Dynamics Links to Weight Loss Resistance: Interaction with CLOCK 3111T/C Genetic Variant
Source: MDPI journal article supplement (doi:10.3390/nu13072463), 2021-07-19
Supplement: s1 [file s1]

## Supplementary Figures

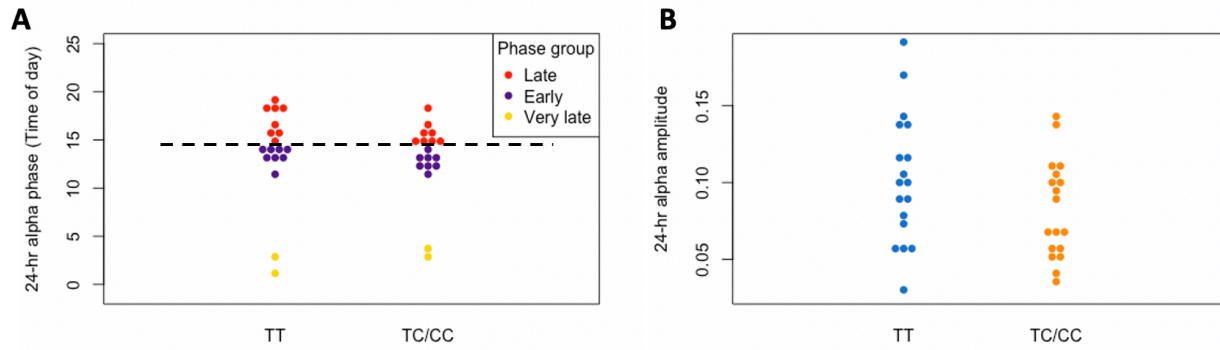

**Figure S1. Inter-individual variabilities in the daily rhythm of fractal cardiac dynamics.** (A) Distribution of the of phase of the 24-h  $\alpha$  rhythm in the TT carriers and TC/CC carriers. (B) Distribution of the amplitude of the 24-h  $\alpha$  rhythm in the TT carriers and TC/CC carriers. The dashed line indicates median value of the phase of the majority (the peak of the 24-h component) at 14:40. These subjects were further divided into three groups: early phase (10 a.m. - 2:40 p.m.), late phase (2:40 p.m. – 8 p.m.) and very late (>12 a.m.).

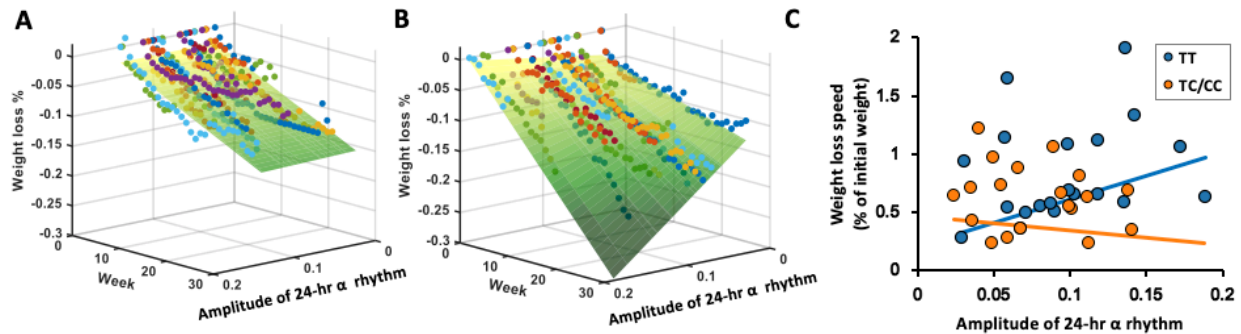

**Figure S2. Difference between C and T groups in the association of weekly weight loss % and the amplitude of 24-hr  $\alpha$  rhythm.** (A-B) Weight loss for different 24-h amplitude over the 20 weeks in C carriers (A) and T carriers (B). Dots of the same color indicate record from one individual. The surface is the predicted value from our model; the more value of weight loss is indicated by the deeper color. (C) Mean individual weekly weight loss percentage (WLS) for different 24-h  $\alpha$  amplitude. Weight loss was presented as the percentage of initial body weight.

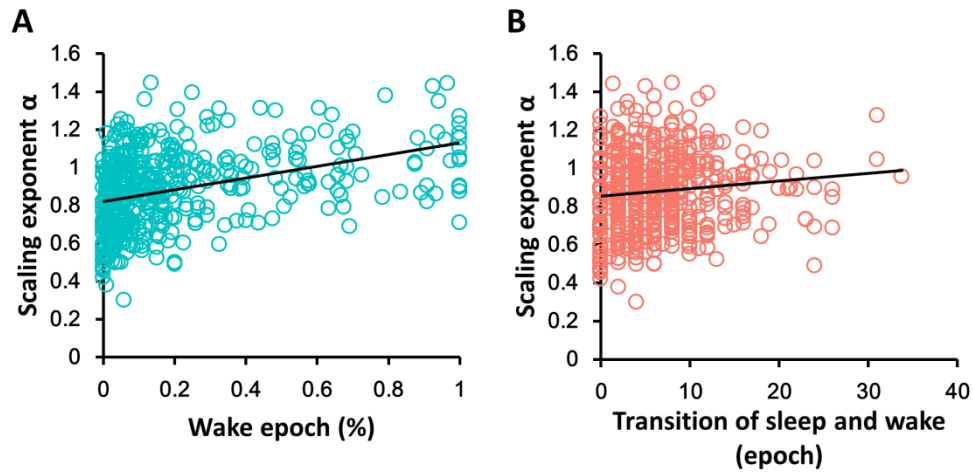

**Figure S3. Associations between fractal cardiac correlations, indicated by scaling exponent  $\alpha$ , and sleep dynamics.** (A) Correlation between proportion of epochs that were labeled as wakefulness and the fractal cardiac correlations. Solid line represents significant a linear correlation with  $R^2=0.14$ ,  $p<0.001$ . (B) Correlation between number of epochs that change from sleep to wakefulness or wakefulness to sleep. Solid line represents a significant linear correlation with  $R^2=0.01$  and  $p=0.02$ . Sleep polysomnography data were collected from 64 subjects. Sleep state (wakefulness or sleep) is labeled on each 30-sec epoch. The fractal cardiac correlations and sleep dynamics are analyzed in each 1-hour segment, and a total of 488 hours were used.

## Supplementary Table S1: Summary statistics for all the models.

### Model 1a: Time, amplitude and phase

#### Type III Analysis of Variance Table with Satterthwaite's method

|                     | Sum Sq | Mean Sq | NumDF | DenDF  | F value | P-value     |
|---------------------|--------|---------|-------|--------|---------|-------------|
| Time                | 3867.1 | 3867.1  | 1     | 620.32 | 1220.64 | <0.0001 *** |
| Amp24               | 1.5    | 1.5     | 1     | 39.98  | 0.47    | 0.4957      |
| phase24_3group      | 0.7    | 0.4     | 2     | 38.27  | 0.11    | 0.8943      |
| Time:Amp24          | 37.3   | 37.3    | 1     | 625.46 | 11.77   | 0.0006 ***  |
| Time:phase24_3group | 41.6   | 20.8    | 2     | 621.41 | 6.56    | 0.0015 **   |

#### Model 1a: post hoc

|                                        |          |       |              |              | P-value               | P-value         |
|----------------------------------------|----------|-------|--------------|--------------|-----------------------|-----------------|
|                                        |          |       |              |              | Compare with          | Compare         |
| Effect of Phase on Time                | Estimate | SE    | lower 95% CI | upper 95% CI | Early phase           | with Late phase |
| Very late phase                        | 0.371    | 0.029 | 0.314        | 0.428        | 0.0782                | 0.0010          |
| Early phase                            | 0.444    | 0.022 | 0.401        | 0.486        |                       | 0.1142          |
| Late phase                             | 0.499    | 0.016 | 0.468        | 0.529        |                       |                 |
| Effect of Amplitude on Time            |          |       |              |              |                       |                 |
|                                        | Estimate | SE    | t val.       | P-value      |                       |                 |
| Slope of Time when Amplitude = -1SD    | 0.393    | 0.022 | 17.053       | <0.0001      |                       |                 |
| Slope of Time when Amplitude = mean    | 0.444    | 0.022 | 20.666       | <0.0001      |                       |                 |
| Slope of Time when Amplitude = +1SD    | 0.495    | 0.029 | 17.108       | <0.0001      |                       |                 |
| Effect of Amplitude on Time (2 groups) |          |       |              |              | P-value               |                 |
|                                        | Estimate | SE    | lower 95% CI | upper 95% CI | Compare with < median |                 |
| Slope of Time when Amplitude > median  | 0.485    | 0.021 | 0.444        | 0.527        | 0.0002                |                 |
| Slope of Time when Amplitude < median  | 0.393    | 0.014 | 0.366        | 0.419        |                       |                 |

### Model 1b: Time, amplitude and phase, including MET and energy intake

#### Type III Analysis of Variance Table with Satterthwaite's method

|                        | Sum Sq | Mean Sq | NumDF | DenDF  | F value | P-value     |
|------------------------|--------|---------|-------|--------|---------|-------------|
| Time                   | 2846.4 | 2846.4  | 1     | 572.99 | 927.29  | <0.0001 *** |
| Amp24                  | 0.3    | 0.3     | 1     | 32.77  | 0.10    | 0.7561      |
| phase24_3group         | 1.62   | 0.81    | 2     | 31.76  | 0.26    | 0.7697      |
| MET_normal             | 2.15   | 2.15    | 1     | 33.65  | 0.70    | 0.4084      |
| TotalEnrIn_normal      | 1.95   | 1.95    | 1     | 33.98  | 0.63    | 0.4314      |
| Time:Amp24             | 57.01  | 57.01   | 1     | 576.80 | 18.57   | <0.0001 *** |
| Time:phase24_3group    | 34.02  | 17.01   | 2     | 572.36 | 5.54    | 0.0041 **   |
| Time:MET               | 102.55 | 102.55  | 1     | 566.85 | 33.41   | <0.0001 *** |
| Time:TotalEnergyIntake | 8.63   | 8.63    | 1     | 577.00 | 2.81    | 0.0942 .    |

#### Model 1b: post hoc

|                                     |          |       |              |              | P-value      | P-value         |
|-------------------------------------|----------|-------|--------------|--------------|--------------|-----------------|
|                                     |          |       |              |              | Compare with | Compare         |
| Effect of Phase on Time             | Estimate | SE    | lower 95% CI | upper 95% CI | Early phase  | with Late phase |
| Very late phase                     | 0.417    | 0.034 | 0.350        | 0.484        | 0.7461       | 0.0159          |
| Early phase                         | 0.446    | 0.022 | 0.402        | 0.490        |              | 0.0226          |
| Late phase                          | 0.522    | 0.016 | 0.491        | 0.553        |              |                 |
| Effect of Amplitude on Time         |          |       |              |              |              |                 |
|                                     | Estimate | SE    | t val.       | P            |              |                 |
| Slope of Time when Amplitude = -1SD | 0.377    | 0.023 | 16.758       | <0.0001      |              |                 |
| Slope of Time when Amplitude = mean | 0.446    | 0.022 | 20.019       | <0.0001      |              |                 |
| Slope of Time when Amplitude = +1SD | 0.514    | 0.032 | 16.347       | <0.0001      |              |                 |

| Effect of Amplitude on Time (2 groups) | Estimate | SE    | lower<br>95% CI | upper<br>95% CI | P-value<br>Compare with<br>< median |
|----------------------------------------|----------|-------|-----------------|-----------------|-------------------------------------|
| Slope of Time when Amplitude > median  | 0.514    | 0.022 | 0.471           | 0.557           | <0.0001                             |
| Slope of Time when Amplitude < median  | 0.409    | 0.016 | 0.378           | 0.440           |                                     |

### Model 2a: CLOCK 3111 genetic variant and time

#### Type III Analysis of Variance Table with Satterthwaite's method

|              | Sum Sq | Mean Sq | NumDF | DenDF  | F value | P-value     |
|--------------|--------|---------|-------|--------|---------|-------------|
| Time         | 5308.8 | 5308.8  | 1     | 625.14 | 1551    | <0.0001 *** |
| CLOCKTC      | 0.7    | 0.7     | 1     | 43.02  | 0.2004  | 0.6567      |
| Time:CLOCKTC | 60.6   | 60.6    | 1     | 625.14 | 17.698  | <0.0001 *** |

#### Model 2a: post hoc

| Effect of CLOCK on Time | Estimate | SE     | lower<br>95% CI | upper<br>95% CI | P-value<br>Compare with<br>CC/CT |
|-------------------------|----------|--------|-----------------|-----------------|----------------------------------|
| TT                      | 0.395    | 0.027  | 0.362           | 0.429           | <0.0001                          |
| CC/CT                   | 0.490    | -0.015 | 0.461           | 0.518           |                                  |

### Model 2b: CLOCK, time, phase and amplitude

#### Type III Analysis of Variance Table with Satterthwaite's method

|                     | Sum Sq | Mean Sq | NumDF | DenDF  | F value | P-value     |
|---------------------|--------|---------|-------|--------|---------|-------------|
| Time                | 3617.4 | 3617.4  | 1     | 619.11 | 1212.67 | <0.0001 *** |
| Amp24               | 4.00   | 4.0     | 1     | 38.78  | 1.34    | 0.2542      |
| CLOCKTC             | 0.00   | 0.0     | 1     | 38.04  | 0.00    | 0.9840      |
| phase24_3group      | 1.30   | 0.6     | 2     | 37.6   | 0.21    | 0.8108      |
| Time:Amp24          | 47.00  | 47.0    | 1     | 624.61 | 15.75   | <0.0001 *** |
| Time:CLOCKTC        | 119.20 | 119.2   | 1     | 620.54 | 39.98   | <0.0001 *** |
| Time:phase24_3group | 76.70  | 38.4    | 2     | 621.82 | 12.86   | <0.0001 *** |

#### Model 2b: post hoc

| Effect of Phase on Time             | Estimate | SE    | lower<br>95% CI | upper<br>95% CI | P-value<br>Compare with<br>Early phase | P-value<br>Compare<br>with Late<br>phase |
|-------------------------------------|----------|-------|-----------------|-----------------|----------------------------------------|------------------------------------------|
| Very late phase                     | 0.319    | 0.029 | 0.261           | 0.376           | <0.0001                                | <0.0001                                  |
| Early phase                         | 0.490    | 0.022 | 0.446           | 0.533           |                                        | 0.863                                    |
| Late phase                          | 0.475    | 0.016 | 0.444           | 0.505           |                                        |                                          |
| Effect of Amplitude on Time         | Estimate | SE    | t val.          | P-value         |                                        |                                          |
| Slope of Time when Amplitude = -1SD | 0.433    | 0.023 | 18.683          | <0.0001         |                                        |                                          |
| Slope of Time when Amplitude = mean | 0.490    | 0.022 | 22.288          | <0.0001         |                                        |                                          |
| Slope of Time when Amplitude = +1SD | 0.548    | 0.029 | 18.778          | <0.0001         |                                        |                                          |
| Effect of CLOCK on Time             | Estimate | SE    | t val.          | P-value         | P-value<br>Compare with<br>CC/CT       |                                          |
| TT                                  | 0.503    | 0.016 | 0.471           | 0.535           | <0.0001                                |                                          |
| CC/CT                               | 0.352    | 0.018 | 0.316           | 0.388           |                                        |                                          |

### Model 3: Interaction of CLOCK, time, amplitude and phase

#### Type III Analysis of Variance Table with Satterthwaite's method

|                | Sum Sq  | Mean Sq | NumDF | DenDF  | F value | P-value     |
|----------------|---------|---------|-------|--------|---------|-------------|
| Time           | 2258.52 | 2258.52 | 1     | 610.69 | 802.73  | <0.0001 *** |
| Amp24          | 1.95    | 1.95    | 1     | 34.22  | 0.69    | 0.4113      |
| CLOCKTC        | 0.09    | 0.09    | 1     | 33.48  | 0.03    | 0.8561      |
| phase24_3group | 0.96    | 0.48    | 2     | 34.17  | 0.17    | 0.8443      |
| Time:Amp24     | 30.78   | 30.78   | 1     | 614.59 | 10.94   | <0.0001 *** |

|                             |        |        |   |        |       |             |
|-----------------------------|--------|--------|---|--------|-------|-------------|
| Time:CLOCKTC                | 88.89  | 88.89  | 1 | 610.69 | 31.59 | <0.0001 *** |
| Amp24:CLOCKTC               | 2.95   | 2.95   | 1 | 34.22  | 1.05  | 0.3134      |
| Time:phase24_3group         | 35.58  | 17.79  | 2 | 612.81 | 6.32  | 0.0019 **   |
| CLOCKTC:phase24_3group      | 0.51   | 0.26   | 2 | 34.17  | 0.09  | 0.9134      |
| Time:CLOCKTC:Amp24          | 105.38 | 105.38 | 1 | 614.59 | 37.46 | <0.0001 *** |
| Time:CLOCKTC:phase24_3group | 18.84  | 9.42   | 2 | 612.81 | 3.35  | 0.0358 *    |

| Model 3: post hoc                   |          |       |        |         | P-value      | P-value         |
|-------------------------------------|----------|-------|--------|---------|--------------|-----------------|
|                                     |          |       | lower  | upper   | Compare with | Compare         |
| Effect of Phase on Time             | Estimate | SE    | 95% CI | 95% CI  | Early phase  | with Late phase |
| <b>CLOCK = CC/TC</b>                |          |       |        |         |              |                 |
| Very late phase                     | 0.206    | 0.069 | 0.070  | 0.342   | 0.0806       | 0.0038          |
| Early phase                         | 0.356    | 0.025 | 0.306  | 0.406   |              | 0.0317          |
| Late phase                          | 0.460    | 0.027 | 0.407  | 0.514   |              |                 |
| <b>CLOCK = TT</b>                   |          |       |        |         |              |                 |
| Very late phase                     | 0.479    | 0.033 | 0.413  | 0.544   | 0.3626       | 0.3001          |
| Early phase                         | 0.556    | 0.043 | 0.472  | 0.640   |              | 0.9156          |
| Late phase                          | 0.538    | 0.018 | 0.503  | 0.573   |              |                 |
|                                     |          |       |        |         |              |                 |
| Effect of Amplitude on Time         | Estimate | SE    | t val. | P-value |              |                 |
| <b>CLOCK = CC/TC</b>                |          |       |        |         |              |                 |
| Slope of Time when Amplitude = -1SD | 0.398    | 0.025 | 16.260 | <0.0001 |              |                 |
| Slope of Time when Amplitude = mean | 0.356    | 0.025 | 14.091 | <0.0001 |              |                 |
| Slope of Time when Amplitude = +1SD | 0.314    | 0.041 | 7.729  | <0.0001 |              |                 |
| <b>CLOCK = TT</b>                   |          |       |        |         |              |                 |
| Slope of Time when Amplitude = -1SD | 0.415    | 0.050 | 8.262  | <0.0001 |              |                 |
| Slope of Time when Amplitude = mean | 0.556    | 0.043 | 13.012 | <0.0001 |              |                 |
| Slope of Time when Amplitude = +1SD | 0.698    | 0.044 | 15.720 | <0.0001 |              |                 |

| Model 3: Subset TT group                                        |         |         |       |         |         |             |
|-----------------------------------------------------------------|---------|---------|-------|---------|---------|-------------|
| Type III Analysis of Variance Table with Satterthwaite's method |         |         |       |         |         |             |
|                                                                 | Sum Sq  | Mean Sq | NumDF | DenDF   | F value | P-value     |
| Time                                                            | 2444.99 | 2444.99 | 1     | 309.953 | 1069.88 | <0.0001 *** |
| Amp24                                                           | 4.47    | 4.47    | 1     | 16.018  | 1.9544  | 0.1812      |
| phase24_3group                                                  | 0.53    | 0.26    | 2     | 15.493  | 0.1155  | 0.8917      |
| Time:Amp24                                                      | 134.01  | 134.01  | 1     | 309.937 | 58.6403 | <0.0001 *** |
| Time:phase24_3group                                             | 7.36    | 3.68    | 2     | 309.523 | 1.6093  | 0.2017      |

| Model 3: Subset CC/TC group                                     |        |         |       |         |         |             |
|-----------------------------------------------------------------|--------|---------|-------|---------|---------|-------------|
| Type III Analysis of Variance Table with Satterthwaite's method |        |         |       |         |         |             |
|                                                                 | Sum Sq | Mean Sq | NumDF | DenDF   | F value | P-value     |
| Time                                                            | 538.25 | 538.25  | 1     | 301.353 | 160.64  | <0.0001 *** |
| Amp24                                                           | 0.06   | 0.06    | 1     | 19.27   | 0.02    | 0.897998    |
| phase24_3group                                                  | 0.87   | 0.43    | 2     | 20.344  | 0.13    | 0.879358    |
| Time:Amp24                                                      | 10.06  | 10.06   | 1     | 303.637 | 3.00    | 0.084207 .  |
| Time:phase24_3group                                             | 32.48  | 16.24   | 2     | 300.642 | 4.85    | 0.008481 ** |

## Supplementary Table S2: Correlation between Final weight and 24-hr alpha

### 1. Final weight and 24-hr alpha amplitude

Dependent variable: Final weight (KG)

Independent variable: 24-hr alpha amplitude

Method: linear regression

|                              | Parameter estimates |           | t Ratio | P-value |
|------------------------------|---------------------|-----------|---------|---------|
|                              | Estimate            | Std Error |         |         |
| 24-hr alpha amplitude (N=39) | -15.43              | 46.43     | -0.33   | 0.74    |

### 2. Final weight and 24-hr alpha phase

Dependent variable: Final weight (KG)

Explanatory variable: 24-hr alpha phase in 3 groups

Method: oneway ANOVA

|                       | Parameter estimates |      | F Ratio | P-value |
|-----------------------|---------------------|------|---------|---------|
|                       | mean                | SE   |         |         |
| Early phase (N=16)    | 72.13               | 3.01 | 0.02    | 0.97    |
| Late phase (N=16)     | 72.2                | 3.01 |         |         |
| Very late phase (N=4) | 73.5                | 6.02 |         |         |
